# Supplementary material for: Arthrobacter rhizophilus sp. nov., an organic phosphate solubilizing bacterium isolated from rhizosphere soil of Meconopsis integrifolia
Source: Research Square preprint supplement (doi:10.21203/rs.3.rs-8214307/v1), 2025-12-12
Supplement: Supplementary file 1 [file 24b69bd6cfa5884cc004e52b.docx]

**Table S1.** The DDH, ANI and AAI values between strain MI7-26T (NCBI accession number JAPFFT000000000) and the related strains.

| **Taxon name** | **Strain name** | **NCBI accession number** | **MI7-26**T | | |
| --- | --- | --- | --- | --- | --- |
| **dDDH (%)** | **ANI (%)** | **AAI**（％） |
| *Arthrobacter gyeryongensis* | DCY72T | GCF_039543785 | 34.2 | 87.57 | 90.85 |
| *Arthrobacter bambusae* | DP-A9 | GCF_022606295 | 32.9 | 87.19 | 90.67 |
| *Arthrobacter ramosus* | CCM1646T | GCF_039535095 | 35.7 | 88.17 | 91.2 |
| *Arthrobacter methylotrophus* | TGAT | GCF_039539965 | 31.2 | 86.22 | 89.8 |
| *Arthrobacter cupressi* | CGMCC 1.10783T | GCF_013409905 | 22.1 | 78.88 | 80.22 |
| *Paenarthrobacter nicotinovorans* | DMS420T | GCF_021919345 | 21 | 77.37 | 78.81 |
| *Paenarthrobacter nitroguajacolicus* | G2-1T | GCF_050413655 | 21.1 | 77.02 | 78.95 |
| *Paenarthrobacter aurescens* | NBRC12136T | GCF_041549525 | 20.8 | 76.89 | 79.04 |
| *Pseudarthrobacter phenanthrenivorans* | Sphe3T | GCF_000189535 | 20.9 | 76.36 | 76.15 |
| *Arthrobacter globiformis* | NBRC12137T | GCF_000238915 | 21.6 | 77.08 | 76.47 |
| *Pseudarthrobacter equi* | IMMIBL-1606T | GCF 900105535 | 21.2 | 76.61 | 75.72 |
| *Pseudarthrobacter chlorophenolicus* | A6T | GCF 000022025 | 21.3 | 76.56 | 75.26 |
| *Pseudarthrobacter siccitolerans* | 4J27T | GCF 001046895 | 21.4 | 76.48 | 75.75 |
| *Pseudarthrobacter enclensis* | NIO-1008T | GCF_001457025 | 21.2 | 76.53 | 75.8 |
| *Arthrobacter woluwensis* | NBRC107840T | GCF_001552095 | 20.6 | 74.21 | 68.84 |
| *Pseudarthrobacter scleromae* | YH-2001T | GCF_014644515 | 21.2 | 76.58 | 76.17 |
| *Arthrobacter terricola* | JH1-1T | GCF_004354015 | 24.7 | 81.33 | 84.66 |
| *Arthrobacter cavernae* | PO-11T | GCF_017368795 | 23.2 | 80.05 | 81.69 |
| *Sinomonas mesophila* | MPKL26T | GCF_001999765 | 20.3 | 73.69 | 68.79 |

**Fig. S1.** Maximum-likelihood phylogenetic tree of strain MI7-26T and its relatives based on the comparison of the 16S rRNA gene sequences. Genbank accession numbers were given in parentheses.


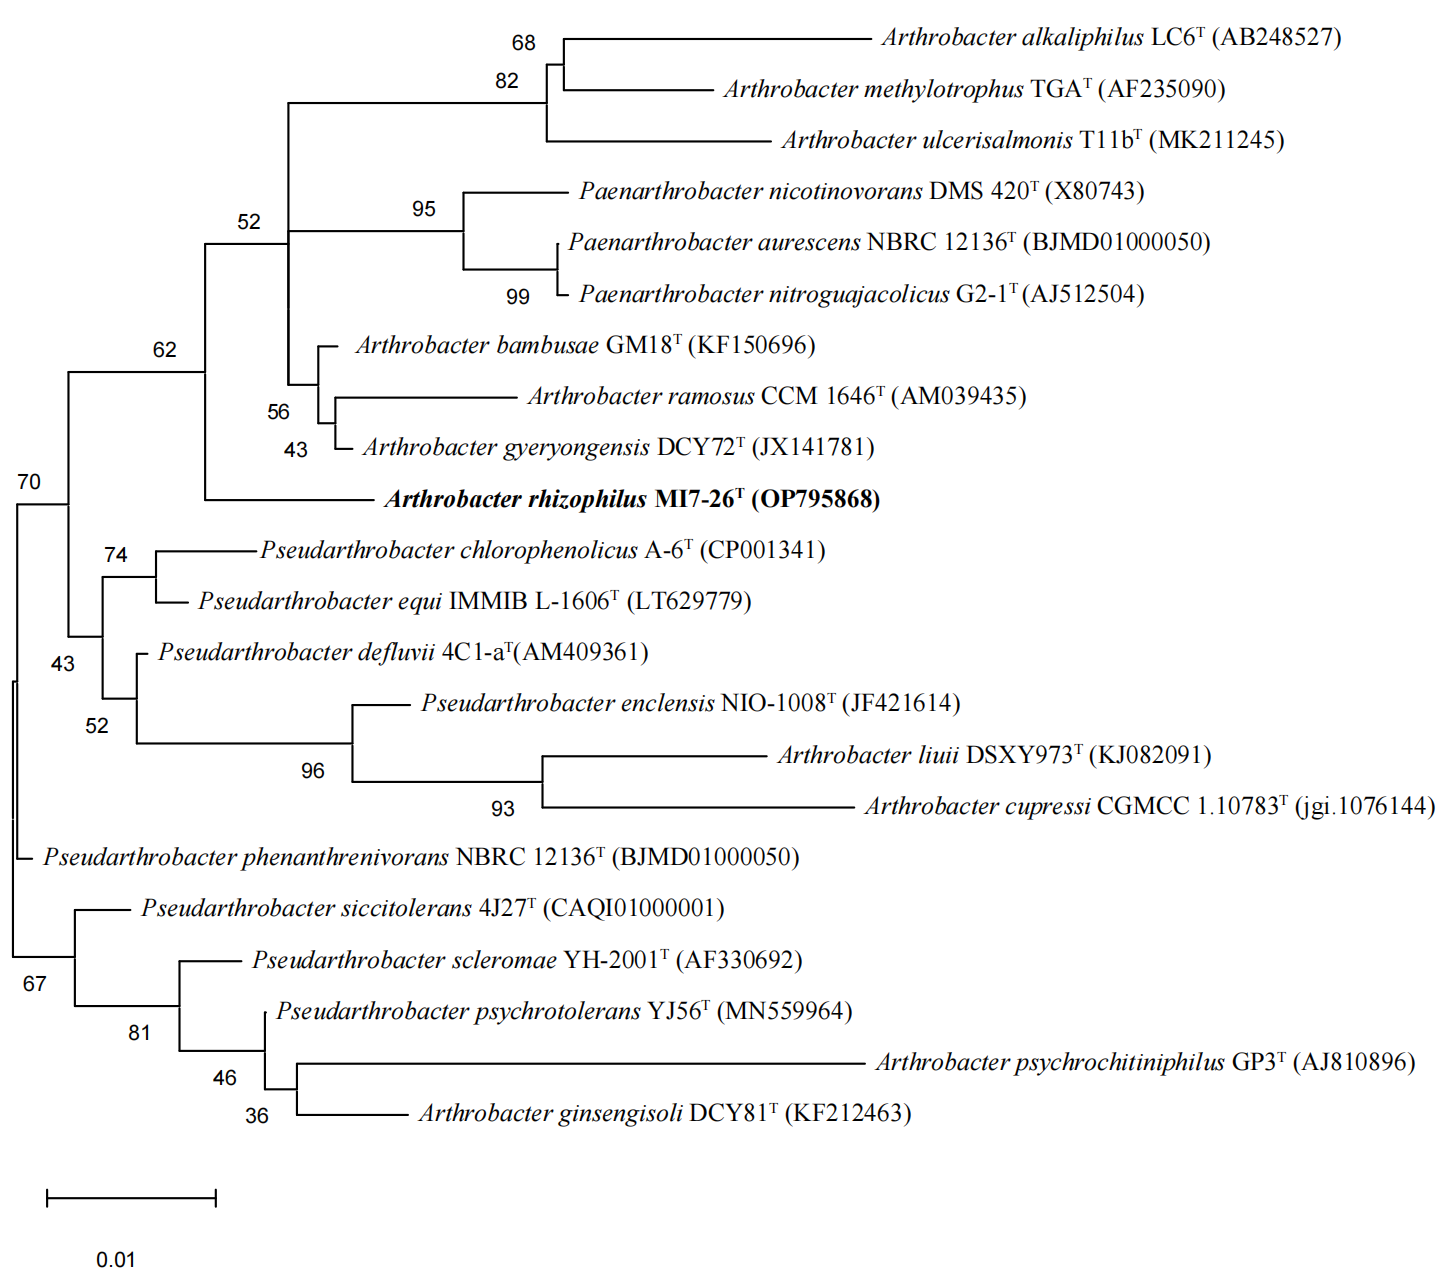


**Fig. S2.** Maximum-parsimony phylogenetic tree of strain MI7-26T and its relatives based on the comparison of the 16S rRNA gene sequences. Genbank accession numbers were given in parentheses.

*Arthrobacter alkaliphilus* LC6T (AB248527)

*Arthrobacter methylotrophus* TGAT (AF235090)

*Arthrobacter ulcerisalmonis* T11bT (MK211245)

*Pseudarthrobacter enclensis* NIO-1008T (JF421614)

*Arthrobacter liuii* DSXY973T (KJ082091)

*Arthrobacter cupressi* CGMCC 1.10783T (jgi.1076144)

*Pseudarthrobacter defluvii* 4C1-aT(AM409361)

*Pseudarthrobacter equi* IMMIB L-1606T (LT629779)

*Pseudarthrobacter chlorophenolicus* A-6T (CP001341)

*Pseudarthrobacter siccitolerans* 4J27T (CAQI01000001)

*Paenarthrobacter aurescens* NBRC 12136T (BJMD01000050)

*Paenarthrobacter nitroguajacolicus* G2-1T (AF512504)

*Paenarthrobacter nicotinovorans* DMS 420T (X80743)

***Arthrobacter rhizophilus* MI7-26T (OP795868)**

*Arthrobacter ramosus* CCM 1646T (AM039435)

*Arthrobacter bambusae* GM18T (KF150696)

*Arthrobacter gyeryongensis* DCY72T (JX141781)

*Pseudarthrobacter phenanthreniv orans* NBRC 12136T (BJMD01000050)

*Pseudarthrobacter scleromae* YH-2001T (AF330692)

*Pseudarthrobacter psychrotolerans* YJ56T (MN559964)

*Arthrobacter ginsengisoli* DCY81T (KF212463)

*Arthrobacter psychrochitiniphilus* GP3T (AJ810896)

93

39

87

79

78

72

61

60

45

38

32

26

26

26

22

16

4

4

17

**Fig. S3**. Phylogenetic tree was inferred from whole-genome comparative analysis, illustrating the relationship between strain MI7-26T and its related species, and was constructed by AutoMLST pipeline (https://automlst.ziemertlab.com). Bootstrap values based on 1000 replicates are shown at the branch nodes. The scale bar represents 0.2 substitutions per nucleotide site.


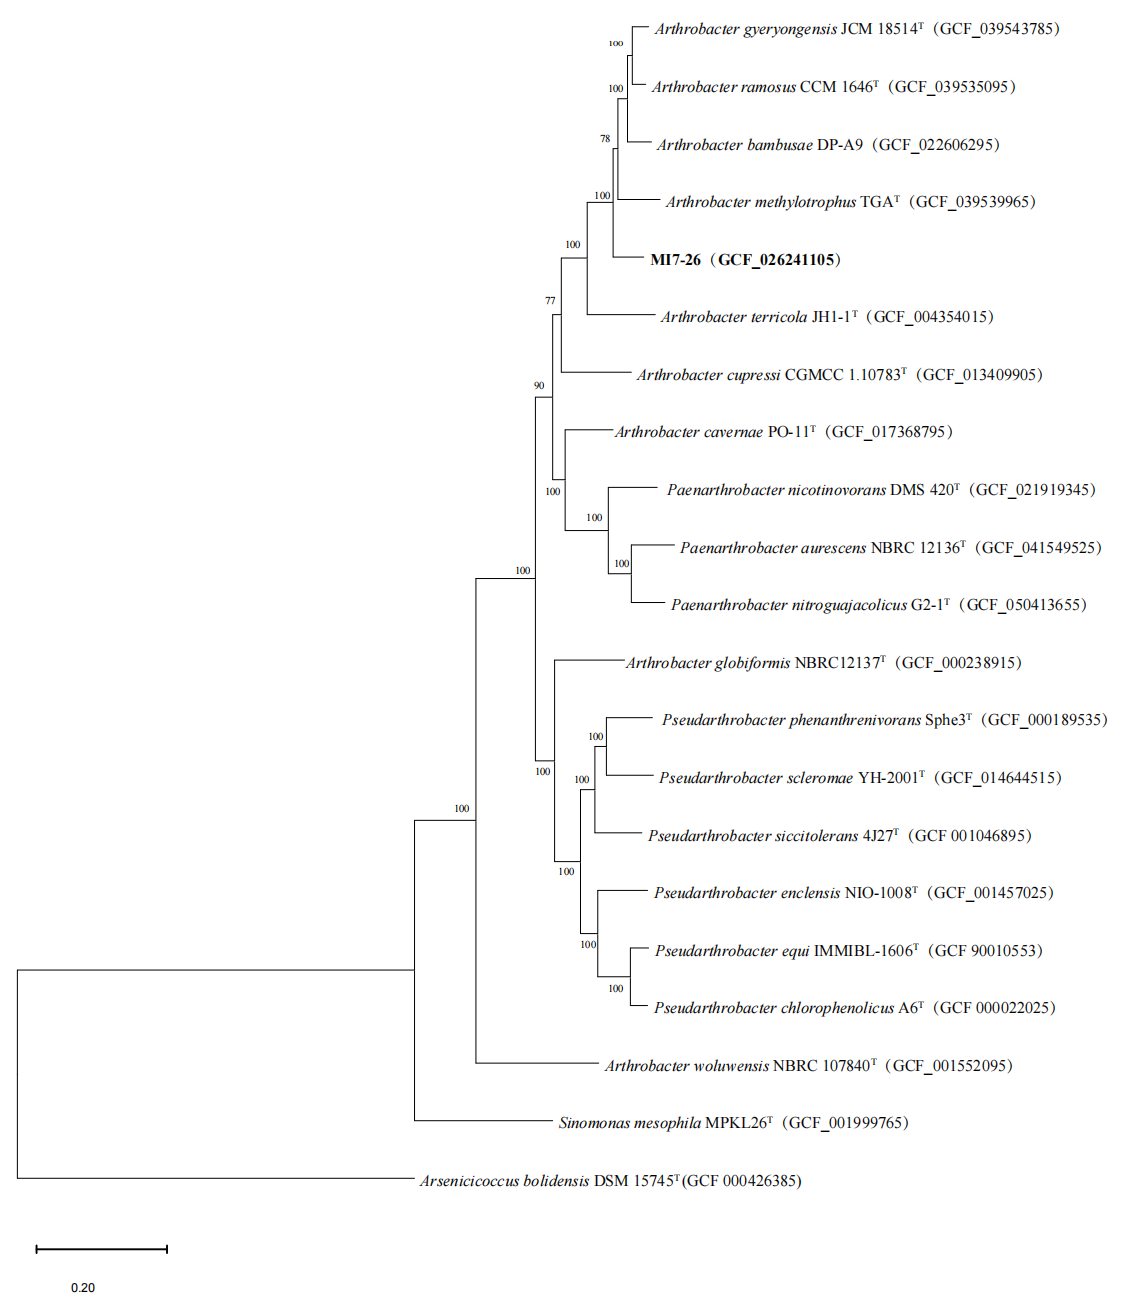


**Fig. S4.** The polar lipids of strain MI7-26T. Polar lipids profiles of strain separated by two-dimensional TLC, which were detected by spraying with molybdatophosphoric acid reagent. (a), molybdophosphoric acid was used to reveal total polar lipids; (b), ninhydrin reagent for aminolipids; (c), ammonium molybdate reagent for phospholipids; (d), a-naphthol reagent for glycolipids. DPG, diphosphatidylglycerol; PG, phosphatidylglycerol; PI, Phosphatidylinositol; PL (1-2), unidentified phospholipids; AL, unidentified aminolipids; GL (1-2), unidentified glycolipids.


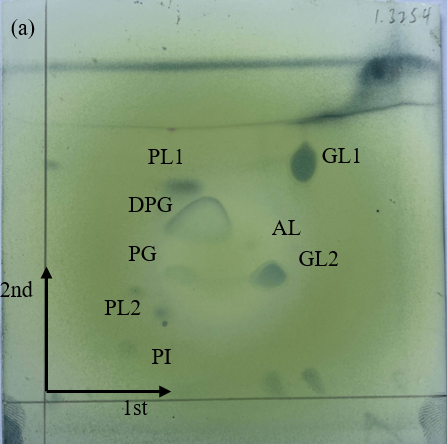

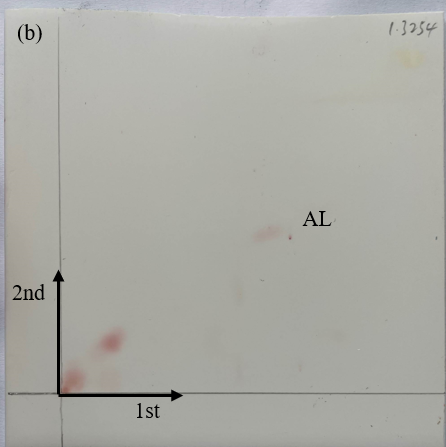


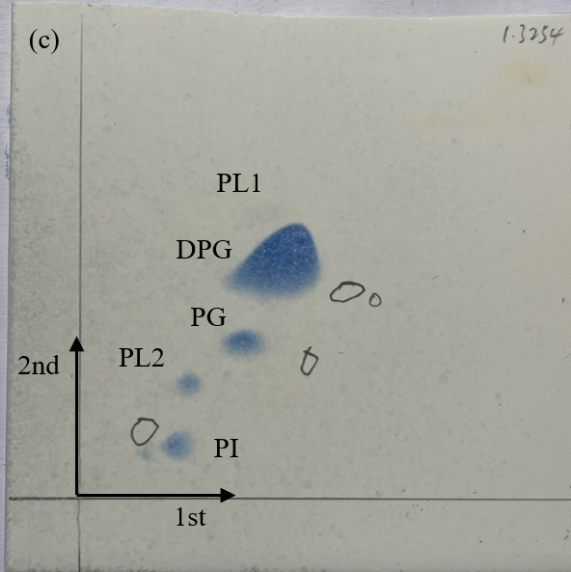

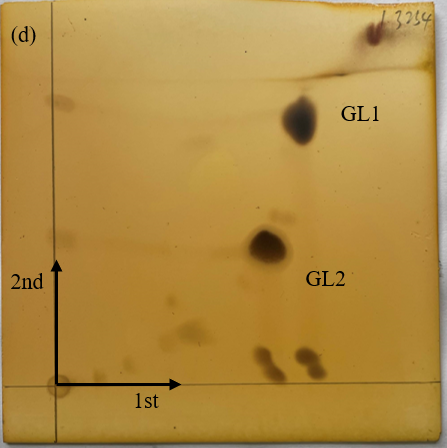


**Fig. S5.** Effect diagram of dissolving organic phosphate of strain MI7-26T. (a), the front of the medium; (b), the back of the medium.

**Fig. S6.** Annotation of the genome of MI7-26T through Proksee. CARD: The comprehensive antibiotic resistance database.

**
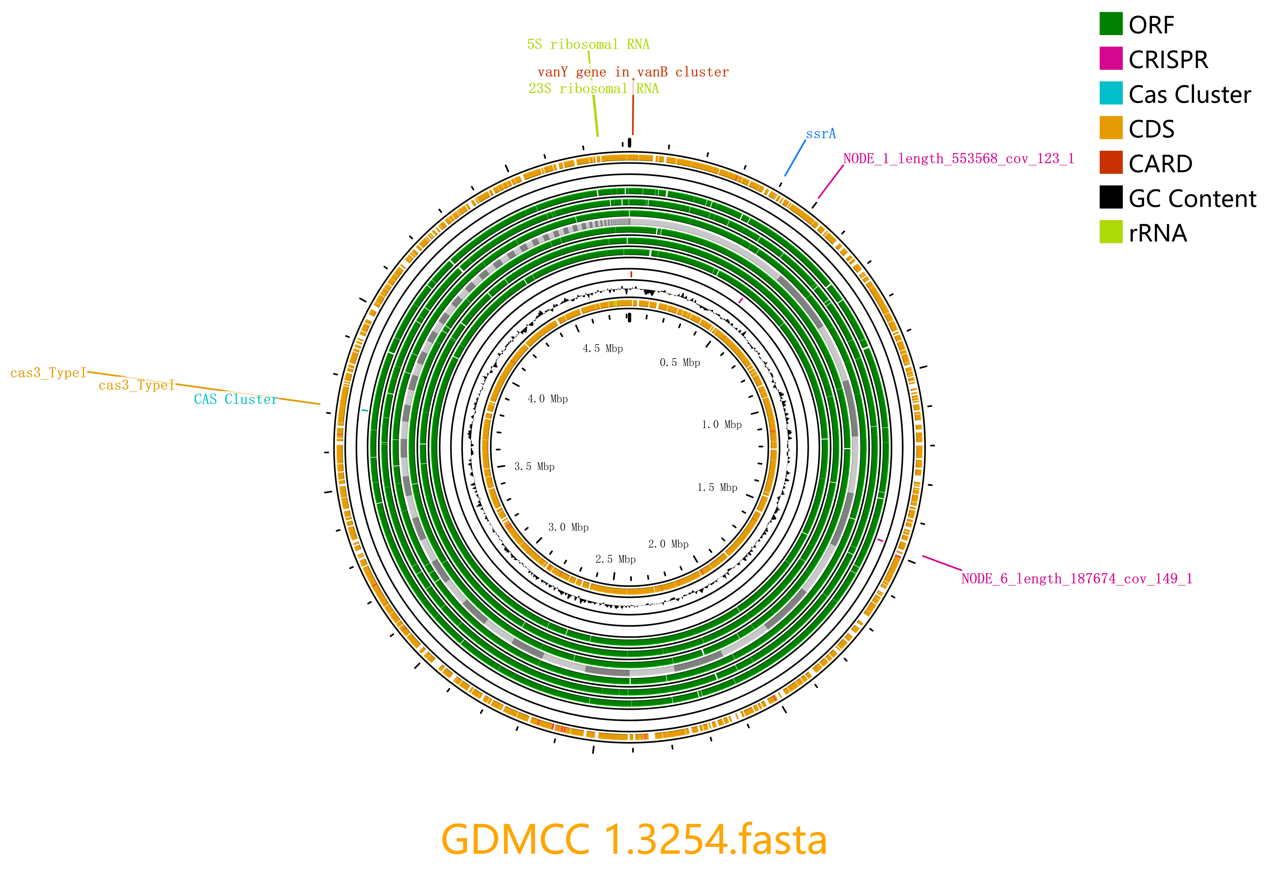
**
